# The *Drosophila* homeobox genes *zfh-1* and *even-skipped* are required for cardiac-specific differentiation of a *numb*-dependent lineage decision

Ming-Tsan Su<sup>1</sup>, Miki Fujioka<sup>2</sup>, Tadaatsu Goto<sup>2,\*</sup> and Rolf Bodmer<sup>1,†</sup>

<sup>1</sup>Department of Biology, University of Michigan, Ann Arbor, MI 48109-1048, USA

<sup>2</sup>Kimmel Cancer Institute, Thomas Jefferson University, 1020 Locust Street, Philadelphia, PA 19107, USA

\*Dr Goto passed away January 31, 1997

†Author for correspondence (e-mail: rolf@umich.edu)

Accepted 30 April; published on WWW 21 June 1999

## SUMMARY

A series of inductive signals are necessary to subdivide the mesoderm in order to allow the formation of the progenitor cells of the heart. Mesoderm-endogenous transcription factors, such as those encoded by *twist* and *tinman*, seem to cooperate with these signals to confer correct context and competence for a cardiac cell fate. Additional factors are likely to be required for the appropriate specification of individual cell types within the forming heart. Similar to *tinman*, the zinc finger- and homeobox-containing gene, *zfh-1*, is expressed in the early mesoderm and later in the forming heart, suggesting a possible role in heart development. Here, we show that *zfh-1* is specifically required for formation of the *even-skipped* (*eve*)-expressing subset of pericardial cells (EPCs), without affecting the

formation of their siblings, the founders of a dorsal body wall muscle (DA1). In addition to *zfh-1*, mesodermal *eve* itself appears to be needed for correct EPC differentiation, possibly as a direct target of *zfh-1*. Epistasis experiments show that *zfh-1* specifies EPC development independently of *numb*, the lineage gene that controls DA1 founder versus EPC cell fate. We discuss the combinatorial control mechanisms that specify the EPC cell fate in a spatially precise pattern within the embryo.

Key words: *zfh-1*, *even-skipped*, *numb*, *Notch*, *spitz*, EGF receptor, Lineage, Cell fate, Zinc finger, Homeodomain, Heart, Pericardial cell, Myocardium, *Drosophila*, Mesoderm, Cardiogenesis, Myogenesis

## INTRODUCTION

The *Drosophila* heart is linear and thus very different in appearance from the looped and chambered heart of vertebrates. By contrast, remarkable similarities are revealed when comparing embryonic origins and genes involved in cardiac specification (Bodmer, 1995; Harvey, 1996; Olson and Srivastava, 1996; Bodmer and Venkatesh, 1998). For example, both the homeobox gene *tinman* in *Drosophila*, as well as its counterparts *Nkx2-5* and *Nkx2-3* in vertebrates, have essential roles in heart development (Bodmer, 1993; Azipazu and Frasch, 1993; Lyons et al., 1995; Fu et al., 1998; Grow and Krieg, 1998; Tanaka et al., 1999). Moreover, vertebrate *tinman*-related genes can substitute, at least in part, for *tinman* function when expressed as transgenes in *Drosophila* (Park et al., 1998a; Ranganayakulu et al., 1998). Similarly, equivalent members of the TGF- family are involved in cardiac induction in both *Drosophila* and vertebrates (Staebling-Hampton et al., 1994; Frasch, 1995; Schultheiss et al., 1997). Thus, basic mechanisms of cardiogenesis may be considerably conserved between vertebrates and invertebrates.

The *Drosophila* heart consists only of a small number of cell types, thus well suited for studying the genetic basis of cell-type diversification during organogenesis. Two major cardiac cell types have been described (Rizki, 1978): the inner contractile

(myo)cardial cells form a central cavity, the lumen of the heart, whereas the outer, non-myogenic pericardial cells align alongside the cardiac cells. A subset of the pericardial cells contain enlarged nuclei and express the homeobox gene *even-skipped* (*eve*, Frasch et al., 1987). Recent advancements have provided a model of how heart development is initiated in *Drosophila* (for review see Bodmer et al., 1997; Bodmer and Frasch, 1999): The bHLH protein Twist and the Zinc finger protein Snail are essential for the mesoderm to form (Simpson, 1983; Thisse et al., 1988; Kosman et al., 1991; Leptin, 1991). Several potential downstream targets of *twist*, which also code for putative transcription factors, are expressed ubiquitously, as *twist*, in the early mesoderm and participate in mesoderm differentiation. These genes include *Dmef2* (Bour et al., 1995; Lilly et al., 1995), *tinman* (Bodmer et al., 1990), *heartless* (Shishido et al., 1993) and *zfh-1* (Lai et al., 1991). The early mesoderm flattens and spreads dorsally into a monolayer closely apposed to the ectoderm under the control of *heartless*, which codes for a FGF receptor (Shishido et al., 1993; Beiman et al., 1996; Gisselbrecht et al., 1996; Shishido et al., 1997). Subsequently, the mesoderm subdivides into four major groups of cells with restricted cell fates: the somatic mesoderm, which forms the skeletal body wall muscles, the visceral mesoderm, which forms the gut muscles, the fatbody/gonadal mesoderm and the cardiac mesoderm, which forms the heart.

Studies of the spatial domains of gene expression indicate that the mesoderm is organized in parasegmental units similar to the ectoderm (Azpiazu et al., 1996; Riechmann et al., 1997). The early expression in transverse stripes of the pair-rule genes *even-skipped* (*eve*) and *sloppy-paired* (*slp*), as well as of the segment polarity genes *wingless* (*wg*) and *hedgehog* (*hh*), have been shown to be crucial for anteroposterior patterning of the developing mesoderm (Wu et al., 1995; Azpiazu et al., 1996; Riechmann et al., 1997; for review see Bodmer and Frasch, 1999). By contrast, the TGF- factor encoded by *dpp* and the homeobox gene *tinman* (at stage 9/10) are expressed perpendicularly to these four genes in a broad dorsal domain along the anteroposterior axis. *Dpp* is secreted from the dorsal ectoderm and necessary to maintain *tinman* expression in the mesoderm. Both are required for subdividing the mesoderm and for specifying dorsal mesodermal cell fates, including the heart (Azpiazu and Frasch, 1993; Bodmer, 1993; Frasch, 1995). Unlike *dpp* and *tinman*, which are essential not only for heart but also for visceral mesoderm formation, *wg* is needed for the cardiac (and some skeletal) but not the visceral mesodermal precursors (Wu et al., 1995; see also Baylies et al., 1995; Ranganayakulu et al., 1996). Thus, it has been postulated that the orthogonal overlap of *wg* and *dpp* signaling in the context of dorsal mesodermal *tinman* expression is sufficient for cardiac cell type specification (W. K. Lockwood and R. B., unpublished).

Because *wg*, *dpp* and *tinman* functions are necessary for all aspects of heart formation, they are unlikely to be sufficient for specifying the distinction between different cardiac cell types. Other spatially restricted cues and mesodermal context information, perhaps in conjunction with these three gene functions, must be involved in further cellular diversification of the heart. It has recently been shown that the lineage gene *numb*, which distinguishes between alternative cell fates during asymmetric cell divisions of the nervous system (Uemura et al., 1989; Rhyu et al., 1994), also acts within the mesoderm (Ruiz Gomez and Bate, 1997; Carmena et al., 1998a), including the heart (Park et al., 1998b).

A possible candidate for providing additional mesodermal context is the zinc finger- and homeobox-containing gene *zfh-1*, since it is as *tinman* widely expressed in the early mesoderm and later prominently in (the pericardial cells of) the forming heart tube (Lai et al., 1991; this study). Previous genetic studies showed that *zfh-1* is required for body wall muscle patterning and gonadal mesoderm (Lai et al., 1993; Broihier et al., 1998; Moore et al., 1998). A vertebrate homolog of *zfh-1*,  $\delta$ EF1, is also involved in certain aspects of mesoderm differentiation (Takagi et al., 1998). In contrast to *zfh-1*, the homeobox gene *eve* (aside from its early metameric pattern at blastoderm) is expressed in a small subset of dorsal mesodermal cells within the cardiac primordium (Frasch et al., 1987). Two *eve*-expressing mesodermal progenitor cells per hemisegment undergo asymmetric divisions under the control of *numb* to give rise to a subset of pericardial cells (the EPCs) and the founder cells of the dorsal muscles (DA1) (Fig. 1A,C; Park et al., 1998b; see also Carmena et al., 1998a,b).

Here, we have studied the function of *zfh-1* and *eve* in cell type specification during heart development. In *zfh-1* mutants, the EPC subset of pericardial cells are selectively missing, apparently without affecting formation of the EPC progenitor cells or the *eve*-expressing DA1 muscles. The cardiac and the

other pericardial cells of the heart do form, but the heart tube suffers from minor to moderate morphological abnormalities. Using a temperature-sensitive allele of *eve*, we show that *eve* function itself is required for EPC differentiation. In addition, *eve* overexpression in *zfh-1* mutants partially restores EPC formation, suggesting that *eve* acts downstream of *zfh-1*. Moreover, the *zfh-1* homeodomain binds in vitro to a *zfh-1* consensus binding site in the *eve* enhancer element, which drives expression specifically in the EPC progenitors and their progeny. Since the initial number of EPC progenitors is unchanged in *zfh-1* mutant embryos, we suggest that *zfh-1* is necessary to maintain *eve* expression and to promote differentiation of the EPC cell type. The phenotype of double mutant combinations of *zfh-1* and *numb* supports the idea that *zfh-1* does not take part in the alternative lineage decision controlled by *numb*, but rather contributes to the appropriate mesodermal context, along with *tinman*, for correct EPC differentiation. Therefore, a precise temporal and spatial combination of multiple positional and context cues are necessary for correct cell type specification.

## MATERIALS AND METHODS

### *Drosophila* stocks

The *Drosophila* mutants *eve<sup>1D</sup>* (or *eve<sup>1</sup>*, a temperature-sensitive allele of *eve*, Nüsslein-Volhard et al., 1984), *spitz<sup>11A</sup>* (Mayer and Nüsslein-Volhard, 1988), *zfh-1<sup>2</sup>* (a protein null allele of *zfh-1*, Lai et al., 1993), *Dmef2<sup>P520</sup>* (Bour et al., 1995), *numb<sup>2</sup>* (Rhyu et al., 1994; Park et al., 1998b), *spdo<sup>ZZ27</sup>* (Skeath and Doe, 1998) and *string<sup>7B69</sup>* (Edgar and O'Farrell, 1989) have been described. Overexpression of transgenes in the mesoderm was achieved by using the UAS/Gal4 described by Brand and Perrimon (1993). UAS-*eve* was obtained from N. Perrimon; UAS-*numb* (Yaich et al., 1998), *twist*-Gal4 (Greig and Akam, 1993), and 24B-Gal4 (Brand and Perrimon, 1993) have been described. *twist*-Gal4 (transgene inserted on second chromosome) was also used in combination with 24B-Gal4 (transgene inserted on third chromosome) to achieve higher, more uniform and persistent mesodermal expression (data not shown). For identification of homozygous mutant embryos, we used balancer chromosomes that contain *wg-lacZ*, *abdA-lacZ* or *ftz-lacZ* transgenes.

### Generation of transgenic flies

The fragment from +5.8 kb to +6.6 kb downstream of the *eve* coding region was inserted downstream of the tubulin poly(A) signal of a modified CaSpeR vector, C3D (Fujioka et al., 1996). Therefore, the relative position of the fragment to the promoter is similar to the in vivo situation (for more information, see Fujioka et al., 1999a). The *eve* enhancer-*lacZ* reporter construct (100 µg/ml) was injected along with a transposase-containing helper plasmid (50 µg/ml) into *yw;+/+;+/+* flies according to standard procedures (Spradling 1986) with some modifications (Fujioka et al., 1999b). The successful transgenic flies were selected by their red eye color (*w<sup>+</sup>*) and maintained as homozygotes.

### Immunocytochemistry and whole-mount embryo in situ hybridization

Immunohistochemical staining and in situ hybridization were performed as described (Bodmer, 1993). Antibodies and dilutions were as follows: anti-Zfh-1c 1:1000 (Lai et al., 1991), anti-Eve 1:5000 (Frasch et al., 1987), anti-Dmef-2 1:1000 (Lilly et al., 1995), pericardial cell surface specific anti-PC (mAb No. 3, Yarnitzky and Volk, 1995; see also Wu et al., 1995) 1:10, anti- $\beta$ -galactosidase 1:4000 (Cappel Labs). Embryos were then double labeled with 5-bromo, 4-chloro-3-indolyl- $\beta$ -D-galactopyranoside (X-gal) and tissue-specific antibodies as

described in Su et al. (1998). Homozygous mutant embryos (ie. lacking the balancer chromosome) were negative for *lacZ* expression. For double antibody staining, the same protocol by Su et al. (1998) was followed, except that during the color reaction the substrate for horseradish peroxidase, diaminobenzidine (Sigma), was used first (brown staining), followed by the Chromogen (Vector SG substrate kit) color reaction (blue-gray staining). For some antibody stainings, the ABC Elite kit (Vector labs) was used to enhance the signal according to the manufacturer's instructions. Tissue sections of stained embryos were performed as described in Wu et al. (1995). Briefly, embryos were stained with antibodies, dehydrated in ethanol, embedded in OCT containing 20% sucrose and cut into 5-10  $\mu$ m frozen sections. For in situ and antibody double stainings, a digoxigenin-labeled antisense *lacZ* mRNA probe was used in conjunction with anti-Eve antibodies according to the protocol described in Mullen and DiNardo (1995). Embryos and sections were mounted in Fluoromount (Southern Biotechnology Associates) and examined with Nomarski optics.

### Temperature-shift experiments

Temperature-shift treatments were carried out as follows: *eve<sup>LD</sup>* embryos were collected on shallow grape agar plates at 1-2 hour intervals at 18°C and aged at 18°C. At the desired developmental stage (see text), embryo-containing plates were covered and submerged in a water bath at 29°C or 32°C for a period of 4 or 2 hours, respectively, with essentially the same result. The embryos were then aged further at 18°C at least until heart tube formation before they were fixed and stained with antibodies. Ages indicated in the text were adjusted for a standard at 25°C (two-fold slower development at 18°C and 1.4 times faster development at 29°C).

### Gel mobility shift assay

Sequence analysis of the 800 bp mesodermal *eve* enhancer (+5.8 kb to +6.6 kb) revealed that it contained a single RCS1 consensus site (CTAATYRRNTT, Y= C or T; R= G or A; Fortini et al., 1991; mismatch is doubly underlined). To test if the Zfh-1 homeodomain can specifically bind (in vitro) to the RCS1 site within the 800 bp enhancer, the following oligonucleotides (plus their inverse complement) were used in gel mobility shift assays: 5'-GCC-TGCTAATTGAGATCGCGG-3' contains the native RCS1 sequence (underlined; mismatch is doubly underlined); 5'-GCCTGCTAATTG-AATTCGCGG-3' contains a perfect RCS1 consensus sequence (underlined); 5'-GCCTGGCGACTAGTCCC GCGG-3' contains a mutated RCS1 sequence (underlined) flanked by native sequence. Gel shifts with either the native or the perfect consensus RCS1-containing oligos gave similar results. Oligos were labeled with polynucleotide kinase and [ $\gamma$ -<sup>32</sup>P]ATP. The *zfh-1*-homeodomain-GST fusion proteins were purified as described in Lai et al. (1991). Protein-DNA binding was carried out in 20 mM Hepes (pH 7.5), 50 mM KCl, 1 mM MgCl<sub>2</sub>, 1 mM DTT, 0.5 mg/ml of BSA, 5% NP-40, 100 mg/ml of poly[d(I-C)] for 20 minutes at 4°C. In the competition experiments, the wild-type and mutant oligos were added to the reaction mixture 20 minutes before adding labeled oligos (a mutant oligo with only 4/11 consensus base pairs changed gave the same results, Z. Han and R. B., unpublished). The mixture was loaded onto a 7.5% non-denaturing acrylamide gel (29:1, polyacrylamide: bis-acrylamide) buffered in 0.5 $\times$  TBE and electrophoresed at 180 V for 2 hours at 4°C.

## RESULTS

### Cardiac phenotype of *zfh-1* mutant embryos

Previous phenotypic analysis suggested that *zfh-1* mutant embryos not only suffer from moderate abnormalities in skeletal muscle patterns but also from occasional kinks in the linear heart tube (Lai et al., 1993; see also Fig. 1E-H). In contrast, early steps in mesoderm differentiation, such as the somatic,

visceral and cardiac mesoderm formation, appear to be normal in *zfh-1* mutant embryos (Fig. 1A,B; data not shown), which suggests that *zfh-1* is probably not required for the initial mesodermal subdivision and subtype specification, but perhaps for later aspects of differentiation, including the heart. Using cardiac-specific markers, we re-evaluated heart formation in *zfh-1* mutants. We found that the EPC-specific *eve* expression is selectively missing without affecting the earlier pattern of mesodermal *eve* expression in Eve progenitors (Fig. 1A-D). In contrast, the number of other cardiac cell type markers is not significantly affected (Fig. 1E-H), and the assembly of the heart tube at the dorsal midline and the formation of somatic muscle fibers does occur, albeit with morphological defects (Fig. 1F,H; Lai et al., 1993). We do not know if the heart morphology defects are due to the missing EPCs or because of a direct effect of *zfh-1* on the other cardiac cell types.

### Mesodermal Eve and Zfh-1 overlap in the early mesoderm but not in pericardial cells

The EPCs are localized within the bilateral rows of pericardial cells, where they are morphologically distinguishable because of their large nuclei (Fig. 2). Since at the heart tube forming stage (stage 14-15) *zfh-1* is primarily expressed in pericardial cells, we wanted to know if cardiac Zfh-1 coincides with Eve in EPCs. Double-labeling for Eve protein and a pericardial cell-specific epitope (using anti-PC antibodies; see materials and methods) revealed that the EPCs are clearly a subset of pericardial cells (Fig. 2B,C). Co-labeling for Eve and Dmef2, a marker of all contractile muscle cells including the cardiac cells, showed that the EPCs are aligned laterally to the cardiac cells but dorsally to the skeletal muscles (Fig. 2D). Finally, co-labeling for Eve and Zfh-1 showed that EPCs and the *zfh-1*-expressing cells are two distinct, non-overlapping subsets of pericardial cells (Fig. 2E). Therefore, it is unlikely that *zfh-1* directs *eve* expression in the EPCs during these late stages of heart development.

In order to determine if *zfh-1* expression at earlier stages coincides with *eve* expression in the cardiogenic region, we observed doubly labeled embryos at the stage when Eve is first expressed and *zfh-1* is present in the entire trunk mesoderm (early stage 11). At that stage, *eve* and *zfh-1* expression clearly overlap (Fig. 2F-H), which means that *zfh-1* is probably required for EPC formation or for EPC-specific *eve* expression at the stage when the EPC progenitors first form.

### EPC progenitor cells form normally in *zfh-1* mutants

Since *zfh-1* expression overlaps with that of *eve* in the EPC progenitor cells but not after the EPCs and DA1 muscles are distinguishable, we wanted to know if the number of EPC progenitor cells in the absence of cell division and muscle fusion is affected in *zfh-1* mutants. For this purpose, we used *string* (*stg*) mutants, in which cell division but not the overall embryonic development is arrested at blastoderm (Edgar and O'Farrell, 1989). In *stg* mutants, as well as in *stg; zfh-1* double mutants, the number of mesodermal Eve cells is similar, which is up to two cells per hemisegment (Fig. 3A,B). This suggests that *zfh-1* is not required to specify the number of EPC progenitors but rather a later process that leads to EPC differentiation.

It is possible that, in *zfh-1* mutants, the EPCs are transformed into muscle founder cells. In order to address this question, we used a *Dmef2* mutant background in which muscle founders do

not fuse with surrounding myocytes (Fig. 3E; see also Bour et al., 1995). Examining embryos doubly mutant for *zfh-1* and *Dmef2* revealed that the number of EPC progenitors is unchanged compared to that of wild-type or single *Dmef2* mutants (Fig. 3C,D). At later stages, however, when EPCs and DA1 founders are distinct, we observe only one *eve*-expressing cell per hemisegment in the double mutant instead of three in the *Dmef2* single mutant (Fig. 3E,F). Therefore, it is unlikely that the EPCs are transformed into DA1 founders in *zfh-1* mutants. These data support the hypothesis that without a functional *zfh-1* gene, *eve* fails to be maintained in the differentiating EPCs.

### ***zfh-1* is required for EPC differentiation independently of the *numb*-controlled EPC progenitor lineage**

It has previously been shown that *numb* controls alternative cell fate decisions during asymmetric cell divisions of the EPC progenitors, in which Numb protein is asymmetrically localized (Park et al., 1998b). In analogy to the situation in the nervous system (Uemura et al., 1989; Rhyu et al., 1994), the daughter cell that inherits Numb assumes the DA1 muscle founder fate whereas its sibling is destined for an EPC fate. Thus, in *numb* mutants, the number of EPCs is doubled and no DA1 muscles form (Fig. 4A,C; Park et al., 1998b). Conversely, no EPCs form in embryos where *numb* is overexpressed, or that are mutant for *sanpodo* (*spdo*), a tropomodulin-encoding gene that functions downstream of and opposite to *numb* (Dye et al., 1998; Skeath and Doe, 1998; Park et al., 1998b). This latter phenotype is similar to that of *zfh-1* mutants (Fig. 4B).

Although the *Dmef2*;*zfh-1* double mutant phenotype is consistent with the idea that *zfh-1* acts independently of the *numb*-controlled lineage decision, since EPCs are not transformed to a DA1 fate in *zfh-1* mutants (Fig. 3F), we wanted to determine directly whether or not *zfh-1* is associated with the genetic pathway controlled by *numb*. If *zfh-1* acted downstream of *numb* in a linear pathway, we would expect a *zfh-1* phenotype in *numb*;*zfh-1* double mutants (as in Fig. 4B). Conversely, if *numb* were downstream, we would expect to see twice the number of EPCs as in *numb* single mutants (Fig. 4C). Interestingly, the phenotype that we observe in *numb*;*zfh-1* double mutants was neither of the two (Fig. 4D): *eve* expression both in EPCs as well as in DA1 muscles is absent in these double mutant embryos. Only rarely are there one or two EPCs present (as in Fig. 4D). These findings strongly suggest that *zfh-1* is not a component of the *numb* pathway, at least not in the same

way as *spdo* is (*numb*;*spdo* double mutants have a *spdo* phenotype; Park et al., 1998b; see also Dye et al., 1998; Skeath and Doe, 1998). Rather, *zfh-1* appears to be required for promoting EPC differentiation, once the *numb*-controlled lineage decision has been made. Thus, in the absence of *numb*, the EPC progenitor division produces only daughter cells with an EPC fate. These prospective EPCs, however, seem to be unable to differentiate correctly in the absence of *zfh-1* function. Consistent with this interpretation is the finding that the number of EPC progenitors earlier on in development is normal in *numb*;*zfh-1* double mutants (data not shown). These findings suggest that *zfh-1* is essential for providing the appropriate mesodermal context for EPC differentiation.

### **The EGF pathway is required for DA1 muscle differentiation independently of *zfh-1* and *numb***

*zfh-1* and the components of the *numb* pathway are not the only factors required for specifying EPC or DA1 founder fates (or for

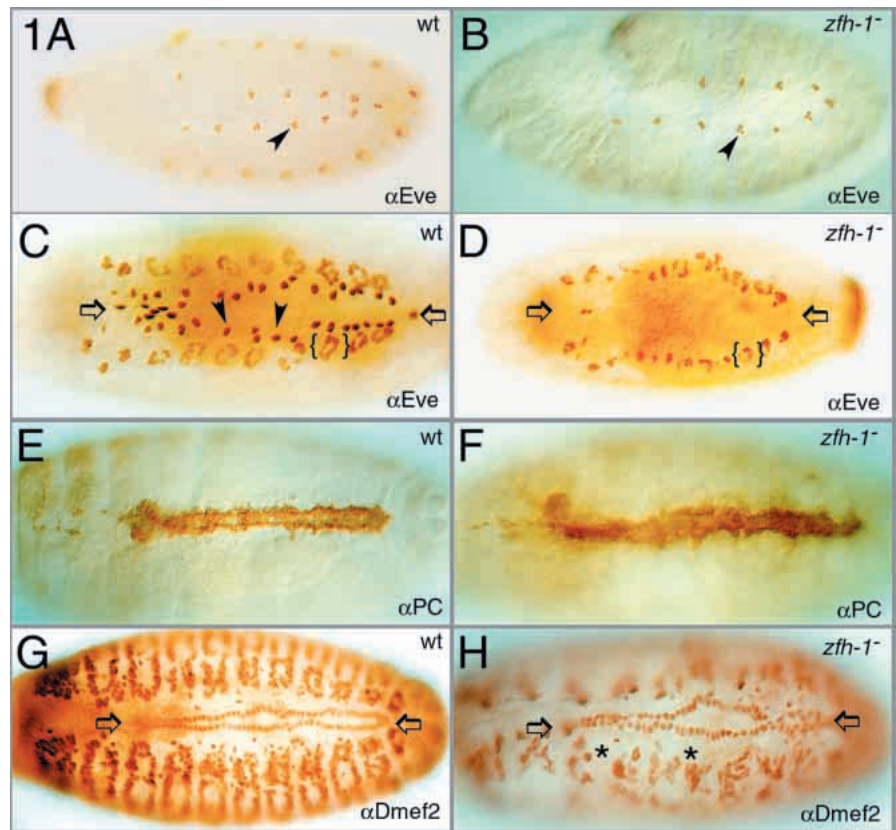

**Fig. 1.** Cardiac phenotype of *zfh-1* mutant embryos. (A,C,E,G) Wild-type embryos, (B,D,F,H) *zfh-1*<sup>2</sup> mutant embryos. (A-D) Mesodermal *eve* expression visualized with anti-Eve antibodies. (A,B) Early stage 11 embryos. (C-H) Stage 15/16 embryos. The number of Eve-containing nuclei (arrowheads) at the time when the EPC progenitors divide (A) appears to be unaffected in *zfh-1* mutants (B). At later stages, EPC-specific *eve* expression (C, arrowheads) is absent (D) but not that of the forming DA1 muscles (brackets). The EPCs are unequivocally identified at these stages by their greater intensity of Eve protein and by their position relative to DA1 muscle. The heart is located between the open arrows. (E,F) The pericardial cells are visualized with anti-PC antibodies. (G,H) The contractile myocardial cell nuclei are visualized with anti-*Dmef2* antibodies. In *zfh-1* mutants, the majority of the myocardial and the pericardial cells are present, but the heart structure has minor to moderate defects (F,H). Some of the body wall muscles are also morphologically defective or missing (H, see also Lai et al., 1993).

**Fig. 2.** Localization of *eve* and *zfh-1* expression during heart development. (B-E) Stage 15/16 embryos. (F-H) Stage 11 embryos. (A) Diagram of a late stage embryonic heart in *Drosophila*. EPC, *eve*-expressing pericardial cells; PC, pericardial cells; CC, myocardial cells; RG, ring gland; LG, lymph glands. (B,C) Localization of EPC-characteristic Eve nuclei (brown, indicated by arrowheads in C-E) within pericardial cells, marked with anti-PC (green-blue). (D) Localization of EPC (brown) adjacent to *Dmef2*-expressing myocardial cells (grey-blue). (D,E) Eve-containing nuclei of a DA1 muscle are indicated by a forked arrow. (E) Co-labeling of late stage embryos with anti-Eve (brown) and anti-Zfh-1 (grey-blue) shows no overlap within the same cell. The apparent coincidence of some (large) brown and (small) grey-blue nuclei is due to two the overlay of two focal planes. (F-H).

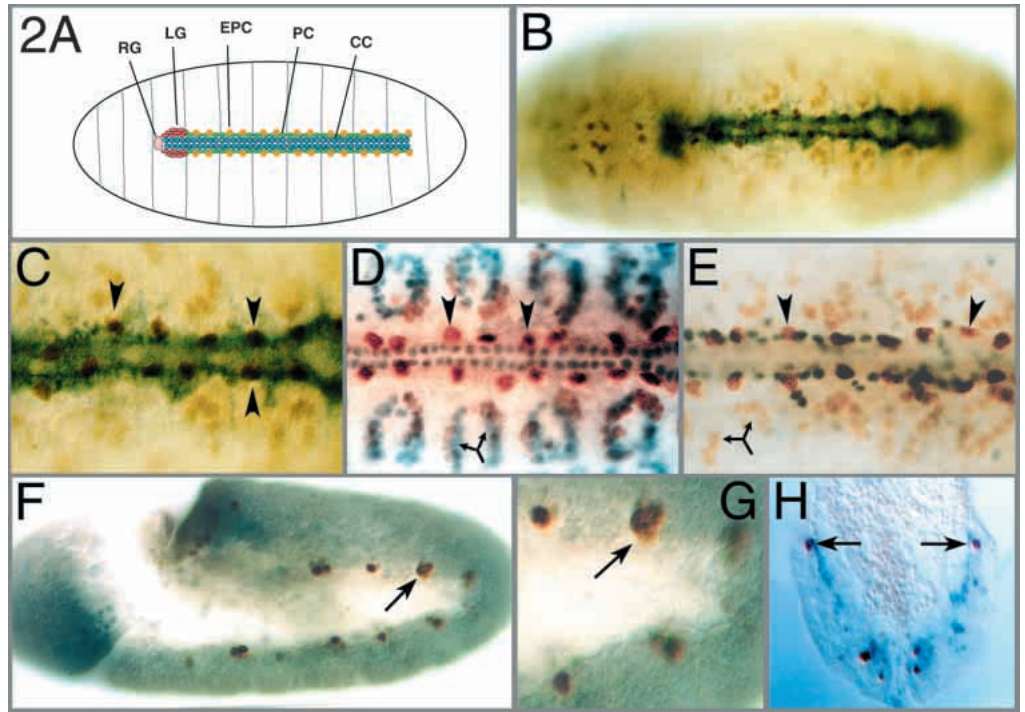

At earlier stages, EPC progenitors (indicated by the arrows) co-express *eve* (brown) and *zfh-1* (grey-blue) at the dorsal edge of the mesoderm. (H) Cross section of the double-stained embryos.

*eve* expression characteristic of these fates). A transcription factor encoded by the *lethal-of-scute* gene is expressed in a cluster of mesodermal cells out of which the EPC and other muscle progenitors emerge aided by a laterally inhibitory mechanism (Corbin et al., 1991; Carmena et al., 1995, 1998b; Park et al., 1998b). *lethal-of-scute*, however, as well as another transcription factor encoded by the *Krüppel* gene, which is expressed in the DA1 (and other muscle) founder cells, are only weakly required for the corresponding muscles to form (Carmena et al., 1995; Ruiz Gomez et al., 1997). In contrast, the

*Drosophila* EGF signal transduction pathway plays an essential role in DA1 specification (Buff et al., 1998). For example, in the absence of the secreted EGF-receptor (DER) ligand *spitz*, the number of EPCs is normal but nearly all the DA1 muscles fail to form (Fig. 4E; see Buff et al., 1998 for a comprehensive analysis of the EGF pathway in DA1 formation).

Since DA1 founders and EPCs are likely to derive from common precursors and the phenotype of *spi* mutants is opposite to that of *zfh-1* (compare Fig. 4B and E), we wanted to determine whether or not *zfh-1* and *spitz* were part of a

**Fig. 3.** EPC progenitor formation in the absence of post-blastoderm cell division or myoblast fusion. All embryos are stained for Eve protein. In both *stg*<sup>7B69</sup> single (A) and *stg*<sup>7B69</sup>;*zfh-1*<sup>2</sup> double mutant embryo (B) a maximum of two EPC progenitors per hemisegment (arrows) are formed. *Dmef-2*<sup>P520</sup> single (C,E) and *Dmef-2*<sup>P520</sup>;*zfh-1*<sup>2</sup> double mutant embryo (D,F). At stage 11, both single and double mutants (C,D) show a wild-type number of *eve*-expressing nuclei (arrows; see Fig. 1A). At later stages, two EPCs (arrowheads) and one DA1 founder cell (arrows) forms per hemisegment in *Dmef-2* single mutants (E). In late *Dmef-2*;*zfh-1* double mutants, the DA1 founder differentiates but not the EPCs (arrows).

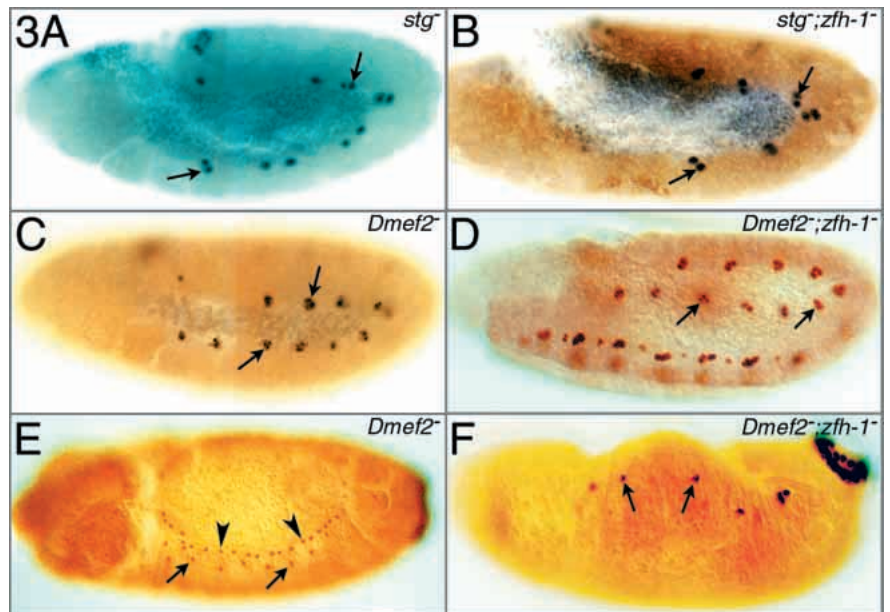

common genetic pathway. In a similar epistasis experiment to that described above, we examined the phenotype of *spitz; zfh-1* double mutants. In these double mutants, neither EPC- nor DA1-specific *eve* expression is present (Fig. 4F), suggesting that the DER pathway is required for DA1 differentiation independently of *zfh-1*. This raises the question whether or not DER pathway activation is required for providing the correct DA1 differentiation context in a way that is reminiscent of *zfh-1* function in providing context for EPC differentiation. If yes, we would expect that *spitz*, like *zfh-1*, functions independently of the *numb* pathway. Indeed, when *numb* is mesodermally overexpressed in *spitz* mutant embryos (*spitz*<sup>-</sup>;UAS-*numb*;twist-Gal4;24B-Gal4), we observe a phenotype similar to that of *spitz; zfh-1* double mutants, in that neither EPC- and nor DA1-specific *eve* expression is observed (Fig. 4G). As is the case for either *zfh-1*, *numb* or *spitz* single mutants, the early *eve* expression in *numb; zfh-1*, *spitz; zfh-1* and *spitz*;UAS-*numb* double mutant embryos appears unchanged (Fig. 4H; data not shown). Taken together, these results suggest that correct cell type-specific differentiation depends on both asymmetric segregation of cell fate determinants during cell division as well as on the appropriate regional context. In this case, the context information (*zfh-1* or DER activity) does not need to be originating from a spatially localized source, but may act in concert with other mesodermal context determinants (e.g., *tinman*).

#### **eve function is required for EPC development**

*eve* is well known for its function in ectodermal segmentation. It has recently been shown that *eve* also participates in patterning of the early mesoderm (for review see Bodmer and Frasch, 1999). *eve* null mutants lack visceral and cardiac mesoderm altogether (Azpiazu et al., 1996). As shown above, *zfh-1* is required for the formation and/or expression of *eve* in EPCs. Thus, mesodermal *eve* expression itself may be needed for correct EPC differentiation. To address this question, we used a temperature-sensitive allele of *eve* (*eve*<sup>LD</sup>), which produces a non-functional but nevertheless antigenic protein at the non-permissive temperature (see Materials and methods). When *eve*<sup>LD</sup> mutant embryos were shifted to the non-permissive temperature for 2 hours at early stage 11, the number of EPCs (expressing *eve*) was drastically reduced (Fig. 5A,D,E): on average only 24% of EPCs were present as compared to wild type. DA1 muscle formation seems to be also affected, but to a lesser degree (data not shown). The EPC deficiency was less severe when the temperature shifts occurred earlier or later in development (Fig. 5B,C). Interestingly, some of the remaining EPCs in early stage 11 shifted embryos are located at some distance from the heart tube (Fig. 5A,D,E), suggesting that *eve* function during this critical time period is required for correct differentiation of the EPCs. Thus, in the absence of *eve*, the forming EPCs lose their association with the heart and disappear.

Temperature shifts during the temperature-sensitive period for EPC formation also affected the overall pericardial cell population (Fig. 5D,E), as seen in *zfh-1* mutant embryos (Fig. 1F,H), perhaps due in part to the lack of EPCs. In contrast to the *zfh-1* phenotype, however, the number of cardiac cells, heart tube formation and overall body muscle formation are not significantly affected in early stage 11 shifted *eve*<sup>LD</sup> embryos

(Fig. 5E), which is not surprising since *eve* is not expressed in these tissues during the critical period for EPC formation. Although *eve* inactivation at earlier stages also perturbs neural development (eg. RP2 neurons), in addition to visceral and somatic muscle formation (data not shown), stage 11 shifts show no morphologically detectable CNS defects (data not shown). We conclude that *eve*, in addition to *zfh-1*, is required for the proper differentiation of the EPCs at the time when the *eve* progenitors normally appear.

#### **Overexpression of *eve* restores EPC formation in *zfh-1* mutant embryos**

Since *zfh-1* is required for *eve* expression in the forming EPCs and *eve* function is required for EPC differentiation, we wondered if *eve* function were sufficient to promote EPC development in the absence of *zfh-1*. Mesodermal expression of *eve* may be autoregulated, as is the case for the *eve* late stripe expression element (Goto et al., 1989, Harding et al., 1989; Fujioka et al., 1995). Thus, *eve* expression may need to be activated at least until autoregulation is initiated. Again, we used the Gal4 system (Brand and Perrimon 1993) to ectopically express *eve* in the all mesoderm of *zfh-1* mutant embryos until but not beyond stage 11. At stage 14/15, we then assayed for EPC-specific endogenous Eve protein expression. In order to achieve this, we used the *twist* promoter to drive Gal4 expression (Greig and Akam, 1993), which in turn drives the *eve* cDNA under the control of UAS Gal4-binding sites. This protocol to overexpress *eve* in the mesoderm of *zfh-1* mutant embryos restores partially the formation of EPCs (Fig. 5F). These results support the hypothesis that *eve* acts downstream of *zfh-1* and that it is required itself for the proper formation of EPCs. Since the rescue is partial, we can not rule out that normally the combination of both *zfh-1* and *eve* functions are necessary for EPC development.

#### **eve is likely a direct target of Zfh-1**

We have presented genetic evidence that *eve* function is essential for the appropriate development of the EPCs. Embryos lacking *eve* at the critical time exhibit a loss of EPCs. Since *zfh-1* seems to be required for maintaining *eve* expression in the forming EPCs, and *zfh-1* and *eve* expression coincide during Eve progenitor formation, it is possible that the Zfh-1 transcription factor directly regulates *eve* gene expression in the mesoderm. An 800 bp enhancer element sufficient to drive expression in the mesoderm has been identified 3' of the *eve* coding region (see Materials and methods; Fujioka et al., 1999a). This mesodermal *eve* enhancer causes reporter gene expression in an identical mesodermal pattern as the endogenous *eve* gene (Fig. 6A,B). *zfh-1* encodes a protein with two distinct DNA-binding motifs, zinc fingers and a homeodomain. A putative consensus Zfh-1 homeodomain-binding sequence (P3/RCS1; Fortini et al., 1991) is present within the *eve* mesodermal enhancer. To test whether the homeodomain of *zfh-1* can bind to the putative P3/RCSI consensus site in this enhancer, a gel mobility shift assay was conducted. The purified *zfh-1* homeodomain-GST fusion protein (Lai et al., 1991) binds specifically to this sequence of the enhancer as determined by competition experiments (Fig. 6C; see Materials and methods). This finding is consistent with the hypothesis that EPC-specific *eve* expression is under the direct control of Zfh-1.

## DISCUSSION

Much is known about the molecular components of a number of signaling pathways that participate in many processes including the development of the *Drosophila* mesoderm (reviewed in Bodmer and Frasch, 1999). In addition, the asymmetric distribution of the *numb* gene product directs alternative cell fates during many lineage decisions (Rhyu et al., 1994; Guo et al., 1996; Spana and Doe, 1996; Ruiz Gomez and Bate, 1997; Carmena et al., 1998a; Park et al., 1998b). Thus, these general mechanisms of cell fate diversification must be accompanied by additional, tissue-specific cues for the correct specification of individual cellular identities. We have provided here evidence that positional cues and lineage mechanisms cooperate with regional- or tissue-specific factors to define the correct differentiation pathway of a heart-associated cell type: *zfh-1*, in addition to *tinman*, seems to provide mesoderm-specific context for differentiation of the EPCs, which are generated by a *numb*-dependent lineage (see model in Fig. 7).

### The role of *zfh-1* and *eve* in heart development

We have shown that *zfh-1* is required for the differentiation of the EPCs but not for the generation of their precursors or their sibling DA1 muscle founder cells (Fig. 1). *eve* appears to also play a role in EPC differentiation, since lowering *eve* function when the EPC progenitors divide disrupts the association of the EPCs with the developing heart (Fig. 5). Although the subsequent fate of these cells is not known, we speculate that they are likely to die, since Eve antibodies localize them at various distances from the heart before they disappear (see Fig. 5A,D,E). Another possibility is that the Eve protein that is generated from the *eve<sup>ts</sup>* allele, when the embryos are shifted to the non-permissive temperature, may be unstable and degraded rapidly. This is less likely, however, since a shift of *eve<sup>ts</sup>* embryos to the non-permissive temperature at a later time of development does not affect either the antigenicity (i.e. presence) of Eve protein within the EPCs or their correct positioning (Fig. 5B). Thus, *eve* and *zfh-1* are required for EPC-specific differentiation. Although the other pericardial cells and the (myo)cardial cells of the heart are formed in *zfh-1* and *eve<sup>ts</sup>* mutants, their correct morphology is disrupted (Figs 1F,H, 5D,E). It is possible that other heart cells are directly affected by the lack of *zfh-1* function. Alternatively, since *eve* is normally not expressed in these other heart-associated cells, the abnormalities in heart morphology may be an indirect effect due to a destabilization of the heart structure, consistent with the idea that EPCs anchor the heart. The structural relationship between EPCs and the other heart cells is unknown.

*zfh-1* is not only needed for EPC formation but also for the development of a number of other mesodermal derivatives, including some of the body wall muscles (Lai et al., 1993; Brohier et al., 1998; Moore et al., 1998; see also Fig. 1H). Although in *zfh-1* mutants, DA1 muscle-specific *eve* expression appears to be present, we can not rule out that normal differentiation of this muscle is affected. Unlike *zfh-1*, *eve* itself seems to be needed for promoting not only EPC but also DA1 muscle differentiation, since *eve* expression is lost from some DA1 muscle cells following removal of *eve* function (Fig. 5A).

Both *zfh-1* and *eve* are required for EPC differentiation, and

maintaining *eve* expression in the forming EPCs appears to depend on *zfh-1* function. Therefore, the role of *zfh-1* in EPC development may be via maintaining *eve* expression. Indeed, mesodermal overexpression of *eve* apparently restores the formation of some of the EPCs in *zfh-1* mutant embryos (Fig. 5F), suggesting that *eve* is genetically epistatic to *zfh-1* in this situation (and maintains its own expression in the EPCs). The finding that the Zfh-1 homeodomain binds *in vitro* to a consensus site (Fortini et al., 1991) within the mesodermal *eve* enhancer (Fig. 6) is consistent with the hypothesis that *eve* is a direct downstream target of *zfh-1*. However, maintaining *eve* expression may not be the only role of *zfh-1* during EPC development, since the rescue of EPC formation is only partial. The incomplete rescue may be due to a direct requirement for *zfh-1*, in parallel to that of *eve*. Alternatively, incorrect timing and levels of ectopic *eve* expression may also account for the lack of complete rescue.

### *zfh-1* acts independently of *numb* and the EGF-receptor pathway

Although the EPC phenotype of *zfh-1* mutants resembles the *spdo* loss-of-function and the *numb* gain-of-function phenotype, *zfh-1* function does not seem to participate in the *numb*-dependent alternative cell fate decision: embryos doubly mutant for *zfh-1* and *numb* do not exhibit the phenotype of either mutant alone (i.e. neither EPCs nor DA1 muscles are formed, see Fig. 4D). Thus, no epistatic relationship appears to exist between these two genes. What is the difference between the genetic functions of *numb* and *zfh-1*? Clearly, the *numb* pathway is not tissue-specific, as it plays a role in many asymmetric lineages. Therefore, it is necessary to invoke other factors that confer specificity as to the exact differentiation pathway to be chosen following alternative cell fate decisions. *zfh-1* is likely to provide the necessary tissue-specific context for those *eve*-expressing mesodermal cells that do not experience a *numb* function, i.e. those destined to differentiate as EPCs (Park et al., 1998b; see also Fig. 7). Thus, if *numb* function is absent, both daughter cells of the EPC progenitors are destined become EPCs but, if *zfh-1* activity is also absent, the EPC-specific differentiation is not executed.

In contrast to the EPCs, correct differentiation of their sibling DA1 founders require *numb* function in addition to DER pathway activity (Fig. 4E). Most of the DER signaling components are ubiquitously expressed, including the relevant (TGF $\alpha$ -like) ligand encoded by *spitz*. Although in our model, DER activation does not need to be locally restricted, a necessary component for *spitz* activation, which is encoded by *rhomboid* (*rho*; Bier et al., 1990), appears to be expressed in the vicinity of the DA1 founders (Buff et al., 1998). Since *zfh-1*; *spitz* double mutants lack differentiation of both daughter cell fates (Fig. 4F), it seems that *zfh-1* does not take part in DER signaling. Therefore, we propose the model that the mesodermal context for EPC and DA1 differentiation is independently interpreted by each daughter cell of the EPC progenitors, depending on the presence or absence of *numb*: DER signaling provides contextual information for DA1 differentiation as *zfh-1* does for EPC differentiation (Fig. 7).

### Combinatorial control of specification and differentiation of a mesodermal cell lineage

Previous studies have shown that the specification of the entire

**Fig. 4.** Genetic epistasis of *zfh-1* in EPC and DA1 development. All embryos are stained for Eve protein at stage 15/16, except (H) which is stage 11. The heart is indicated by open arrows, EPCs by arrowheads and DA1 muscles by brackets. (A) Wild-type embryo. (B) *zfh-1<sup>2</sup>* mutant showing no EPCs, only DA1 muscles. (C) *numb<sup>2</sup>* mutant showing no DA1 muscles but twice the number of EPCs (Park et al., 1998b). (D) *numb<sup>2</sup>;zfh-1<sup>2</sup>* double mutant showing no EPCs and no DA1 muscles, except for rare occurrences (arrowhead). (E) *spitz<sup>IIA</sup>* mutant showing the normal number of EPCs, but no DA1 muscles. (F) *spitz<sup>IIA</sup>;zfh-1<sup>2</sup>* mutant showing no EPCs and no DA1 muscles (with few exceptions, arrowheads). (G) *spitz<sup>IIA</sup>* mutant embryo expressing *numb* throughout the mesoderm (*twi/24B-Gal4 × UAS-numb*). Note the absence of EPCs and DA1 muscles. (H) Embryo with same genotype as G but at an earlier stage (11). Note that the initial *eve* expression appears to be normal. Normal *eve* expression at stage 11 was also observed in *numb<sup>2</sup>;zfh-1<sup>2</sup>*, *spitz<sup>IIA</sup>;spdo<sup>ZZ27</sup>* or *spitz<sup>IIA</sup>;zfh-1<sup>2</sup>* double mutants (data not shown).

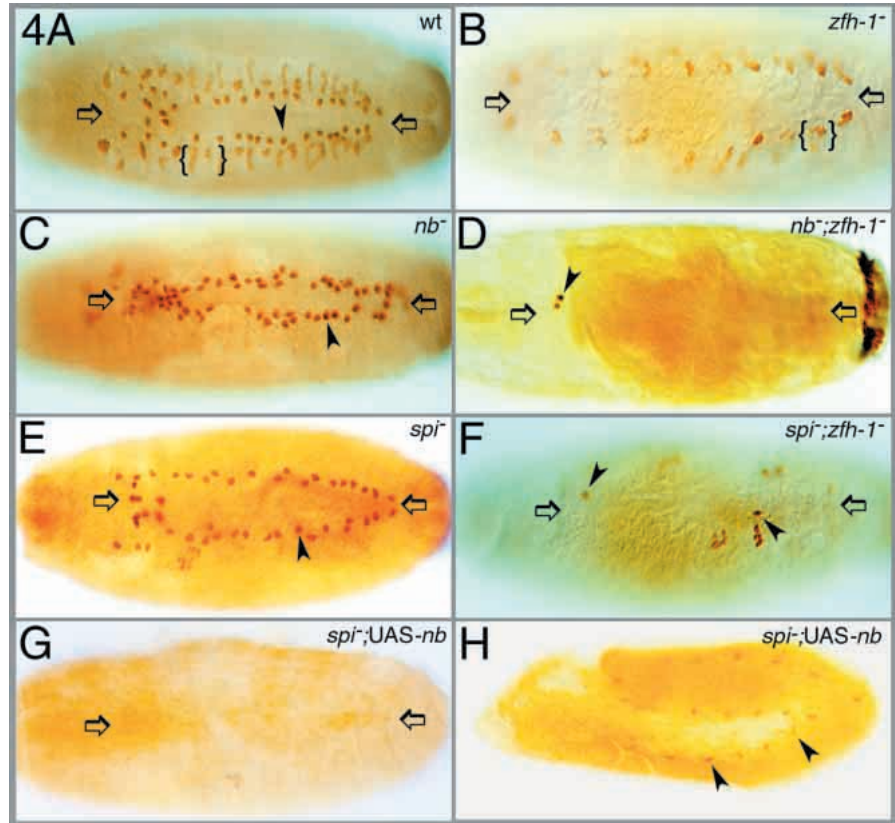

**Fig. 5.** Temporal requirement of *eve* during heart development. (A-E) Temperature-sensitive *eve<sup>ts</sup>* embryos were collected and aged at 18°C, then shifted to the restrictive temperature (32°C) for 2 hours at the indicated times of embryonic development (see materials and methods). Embryos were then aged further until stage 15/16 (14-16 hours of development) normalized to 25°C and stained with anti-Eve antibodies alone (A-C,F), or in conjunction with anti-PC (D), or anti-Dmef2 (E) antibodies. (A,B,D,E) *eve<sup>ts</sup>* mutant embryos shifted to the restricted temperature at 5-6 hours (early stage 11) or 7-8 hours (late stage 11) of development, respectively. Note that in the early but not the late shifts most EPCs (and DA1 muscles) are missing or have lost their association with the heart (arrowheads in A,D; location of the heart between open arrows). (C) The wild-type heart contains an average of 42 *Eve*-positive pericardial cells, which are associated with the heart. 40-50 embryos were scored at each time point for the presence of EPCs. (F). Ectopic expression of *eve* (*twi-Gal4 × UAS-eve*) in *zfh-1* mutant background. Note that some EPCs have been restored in the *zfh-1* mutant embryos (indicated by arrowheads).

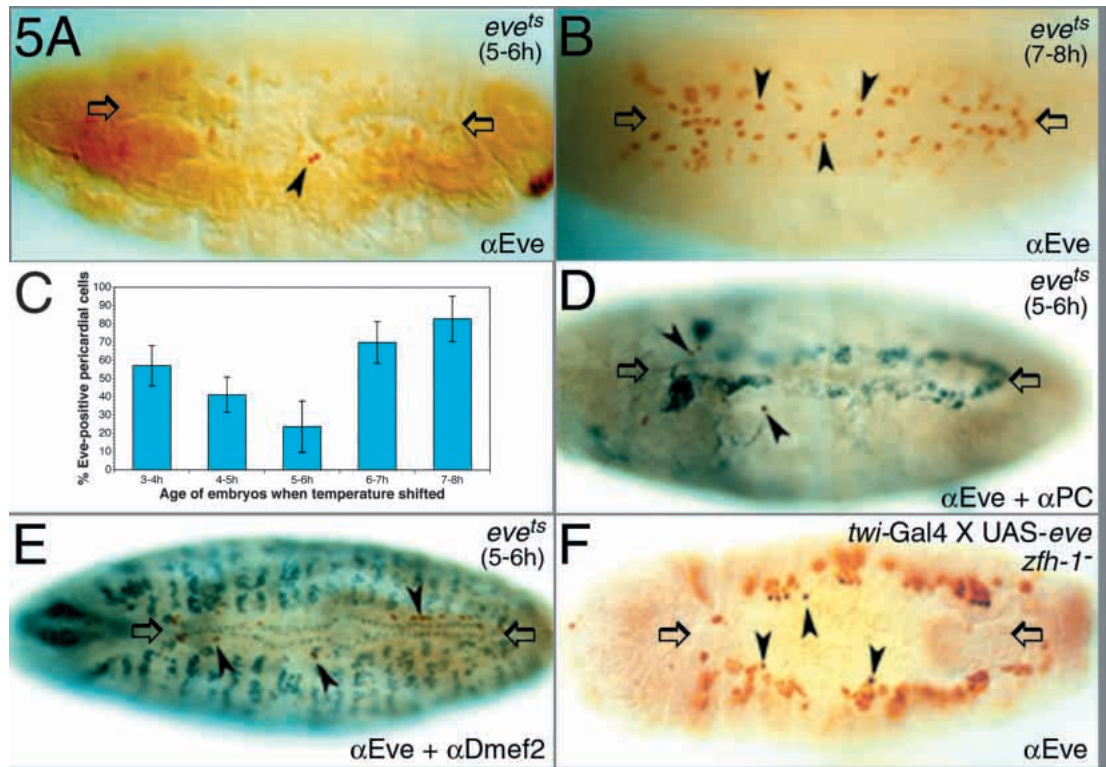



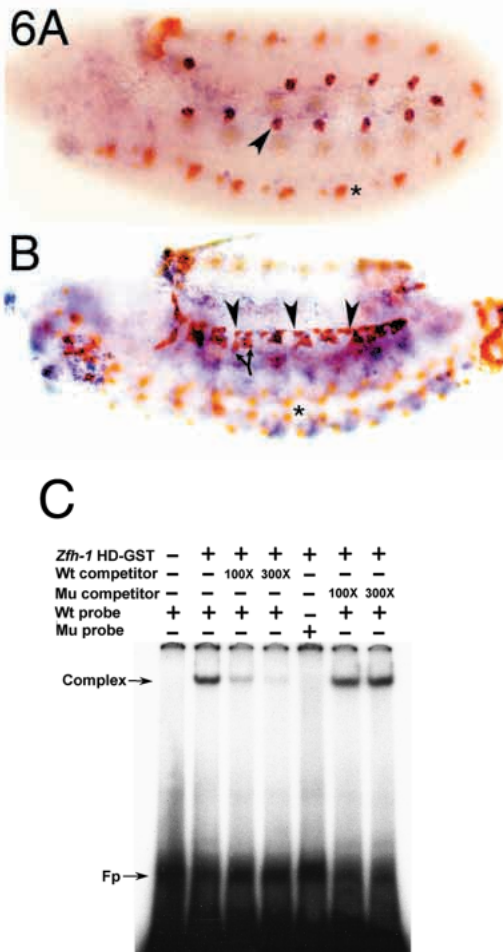

**Fig. 6.** An 800 bp *cis*-regulatory element of *eve* confers mesoderm-specific expression. (A,B) Eve protein (brown) and *lacZ* reporter gene expression (purple) driven by the 800 bp *eve* enhancer element in transgenic embryos (see Materials and methods). Note the cellular coincidence of Eve protein and *lacZ* RNA expression in the EPC progenitors at stage 11 (A, arrowhead) and at stage 13/14 (B) in the forming EPCs (arrowheads) and DA1 muscles (forked arrow). Since the *lacZ* RNA is cytoplasmic, the purple stain appears somewhat broader. (B) Some non-specific purple staining is also present. Asterisk indicates Eve protein in the CNS. (C) Gel mobility shift assay with GST-Zfh-1-HD fusion protein and the RCS1 consensus site of the 800 bp *eve* enhancer element (see Materials and methods). Note that the amount of bound complex is decreased as the concentration of unlabeled wild-type, but not of mutant, competitor DNA concentration increases. Complex, protein and DNA complex; Fp, Free probe.

cardiac mesoderm, including the EPC progenitors, depends on mesoderm endogenous transcription factors (*twist* and *tinman*) as well as on inductive signals encoded by *wg* and *dpp* that are expressed in specific patterns (reviewed in Bodmer and Frasch, 1999). Moreover, embryonic tissue at the intersection of both *wg* and *dpp* signaling and in the presence of *tinman* has the potential to differentiate with a cardiac-specific cell fate, including in non-mesodermal regions (W. K. Lockwood and R. B., unpublished).

How do the two mechanisms, i.e., global specification of (cardiac) competence and cell type-specific differentiation,

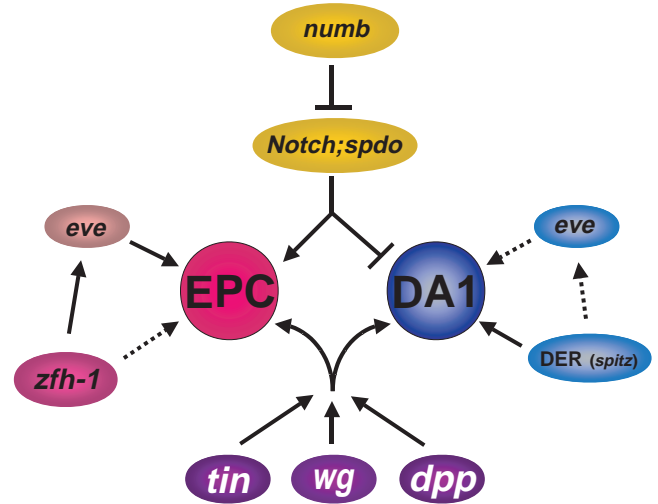

**Fig. 7.** Model of the genetic network regulating the specification and differentiation of the EPC progenitors and their heart and muscle associated progeny (EPC and DA1). First, the spatially coincident activity of the transcription factor, Tinman, together with the mesoderm-specific response induced by the patterning signals, Wg and Dpp, are necessary to specify and position the most dorsal portion of the mesoderm, which includes the EPC progenitors and other cardiac precursors. The EPC progenitors then divide and produce two types of progeny cells under the control of the lineage gene *numb*. The daughter cell that inherits Numb protein will differentiate as the DA1 muscle founder, because *Notch* and *spdo* encoded functions are inhibited, allowing DER signaling (*spitz*) to be effective (perhaps in conjunction with Eve). In the daughter cell without Numb, Notch signaling is operational and the transcription factors Zfh-1 together with and/or mediated by Eve can effectively contribute the correct differentiation of the EPC fate. Thus, three levels of information appear to cooperate in the specification of a particular cell fate: pre-patterning or positional information, asymmetric lineages and tissue context information.

interface with each other? In the model that we are proposing (Fig. 7), specification of a particular cell type (that of EPCs in this case) is a step-wise process and the sequential elements of specification are integrated on a defined enhancer element (Fig. 6). First, the mesoderm determinant *twist* activates transcription of the mesodermal transcription factors *tinman* and *zfh-1*. Then, *dpp* signaling originating from the dorsal ectoderm maintains *tinman* expression in the underlying dorsal mesoderm (Frasch, 1995). In addition, the striped expression of *wg* is needed for maintaining *tinman* expression in the more restricted pattern of the presumptive cardiac mesoderm (Wu et al., 1995). All three components seem to be necessary for the subsequent differentiation of cardiac cell types, since ectopic heart-specific gene expression only occurs at intersects of *dpp*, *wg* and *tinman* expression (W. K. Lockwood and R. B., unpublished).

As a consequence of the convergent functions of *dpp*, *wg* and *tinman* at the dorsal edge of the mesoderm, *eve* expression is initiated in the EPC progenitors. Moreover, the mesodermal *eve* enhancer contains consensus binding sites for Tinman as well as *wg* and *dpp* consensus response elements (Z. Han, M.-T. S. and R. B., unpublished). This is consistent with the hypothesis that these gene functions directly affect mesodermal

*eve* expression. *eve* expression is not initiated in all heart progenitors, however, which may be due in part to the inhibitory function of the *ladybird* homeobox genes, which are expressed in heart precursors adjacent to the EPC progenitors (Jagla et al., 1997). The presence of Ladybird consensus sites in the mesodermal *eve* enhancer suggests that regulation of *eve* expression by *ladybird* may be direct (Z. Han, M.-T. S. and R. B., unpublished).

With the initiation of the EPC progenitor lineage, Numb is localized asymmetrically in the progenitors and segregates to only one of the progeny. In the daughter cell that receives Numb, DA1 founder differentiation is initiated, in cooperation with DER activity. In the Numb-deficient daughter, EPC differentiation ensues, aided by *Zfh-1*. Taken together, the data presented suggest that a two-tiered context information system (first *tinman* then *zfh-1*) operates in conjunction with global mechanisms of specifying position (*dpp* and *wg*) and of generating asymmetric lineages (*numb*) to specify tissue- and position-specific cell fates within the developing embryo.

We thank M. Akam, A. Brand, B. Edgar, M. Frasch, Y. N. Jan, Z. Lai, B. Patterson, N. Perrimon, T. Volk and the Bloomington stock center for sending fly stocks, DNA constructs and antibodies. We also thank K. Golden for excellent assistance in making the figures, and Z. Han, K. Hardiman, J. B. Jaynes, M. Liu, W. K. Lockwood for comments on the manuscript. M.-T. S. was supported by a fellowship from the Organogenesis Center of the University of Michigan, T. G. by a grant from NSF, and R. B. by grants from NIH and the American Heart Association.

## REFERENCES

- Azpiazu, N. and Frasch, M. (1993). *tinman* and *bagpipe*: Two homeobox genes that determine cell fates in the dorsal mesoderm of *Drosophila*. *Genes Dev.* **7**, 1325-1340.
- Azpiazu, N., Lawrence, P. A., Vincent, P. J. and Frasch, M. (1996). Segmentation and specification of the *Drosophila* mesoderm. *Genes Dev.* **10**, 1325-1340.
- Baylies, M., Martinez Arias, A. and Bate, M. (1995). *wingless* is required for the formation of a subset of muscle founder cells during *Drosophila* embryogenesis. *Development* **121**, 3829-3837.
- Beiman, M., Shilo, B. and Volk, T. (1996). Heartless, a *Drosophila* FGF receptor homolog, is essential for cell migration and establishment of several mesodermal lineages. *Genes Dev.* **10**, 2993-3002.
- Bier, E., Jan, L. Y. and Jan, Y. N. (1990). *rhomboid*, a gene required for dorsoventral axis establishment and peripheral nervous system development in *Drosophila melanogaster*. *Genes Dev.* **4**, 190-203.
- Bodmer, R. (1993). The gene *tinman* is required for specification of the heart and visceral muscles in *Drosophila*. *Development* **118**, 719-729.
- Bodmer, R. (1995). Heart development in *Drosophila* and its relationship to vertebrate systems. *Trends Cardiovasc. Med.* **5**, 21-27.
- Bodmer, R., Jan, L. Y. and Jan, Y. N. (1990). A new homeobox-containing gene, *msh-2* (*tinman*), is transiently expressed early during mesoderm formation in *Drosophila*. *Development* **110**, 661-669.
- Bodmer, R., Golden, K., Lockwood, W., Ocorr, K., Park, M., Su, M.-T. and Venkatesh, T. V. (1997). Heart development in *Drosophila*. In *Advances in Developmental Biology* (ed. P. Wasserman), pp. 201-236. Greenwich, CT: JAI Press, Inc.
- Bodmer, R. and Venkatesh, T. V. (1998). Heart development in *Drosophila* and vertebrates: conservation of molecular mechanisms. *Dev. Genet.* **22**, 181-186.
- Bodmer, R. and Frasch, M. (1999). Genetic determination of *Drosophila* heart development. In *Heart Development*, pp. 65-90 (ed. N. Rosenthal and R. Harvey). San Diego, London, New York: Academic Press.
- Bour, B. A., O'Brien, M. A., Lockwood, W. L., Goldstein, E. S., Bodmer, R., Taghert, P. H., Abmayr, S. M. and Nguyen, H. T. (1995). *Drosophila* *mef2*, a transcription factor that is essential for myogenesis. *Genes Dev.* **9**, 730-741.
- Brand, A. H. and Perrimon, N. (1993). Targeted gene expression as a means of altering cell fates and generating dominant phenotypes. *Development* **118**, 401-415.
- Broihier, H. T., Moore, L. S., Van Doren, M., Newman, S. and Lehmann, R. (1998). *zfh-1* is required for germ cell migration and gonadal mesoderm development in *Drosophila*. *Development* **125**, 655-666.
- Buff, E., Carmena, A., Gisselbrecht, S., Jimenez, F. and Michelson, A. M. (1998). Signaling by the *Drosophila* epidermal growth factor receptor is required for the specification and diversification of embryonic muscle progenitors. *Development* **125**, 2075-2086.
- Carmena, A., Bate, M. and Jimenez, F. (1995). *lethal of scute*, a proneural gene, participates in the specification of muscle progenitors during *Drosophila* embryogenesis. *Genes Dev.* **9**, 2373-2383.
- Carmena, A., Murugasu-Oei, B., Menon, D., Jimenez, F. and Chia, W. (1998a). *inscuteable* and *numb* mediate asymmetric muscle progenitor cell divisions during *Drosophila* myogenesis. *Genes Dev.* **12**, 304-315.
- Carmena, A., Gisselbrecht, S., Harrison, J., Jimenez, F. and Michelson, A. M. (1998b). Combinatorial signaling codes for the progressive determination of cell fates in the *Drosophila* embryonic mesoderm. *Genes Dev.* **15**, 3910-3922.
- Corbin, V., Michelson, A. M., Abmayr, S. M., Neel, V., Alcamo, E., Maniatis, T. and Young, M. W. (1991). A role for the *Drosophila* neurogenic genes in mesoderm differentiation. *Cell* **67**, 311-323.
- Dye, C. A., Lee, J.-K., Atkinson, R. C., Brewster, R., Han, P.-L. and Bellen, H. J. (1998). The *Drosophila sanpodo* gene controls sibling cell fate and encodes a tropomodulin homolog, an actin/tropomyosin associated protein. *Development* **125**, 1845-1856.
- Edgar, B. A. and O'Farrell, P. H. (1989). Genetic control of cell division patterns in the *Drosophila* embryo. *Cell* **57**, 177-187.
- Fortini, M. E., Lai, Z. and Rubin, G. M. (1991). The *Drosophila zfh-1* and *zfh-2* genes encode novel proteins containing both zinc-finger and homeodomain motifs. *Mech. Dev.* **34**, 113-122.
- Frasch, M. (1995). Induction of visceral and cardiac mesoderm by ectodermal *Dpp* in the early *Drosophila* embryo. *Nature* **374**, 464-467.
- Frasch, M., Hoey, T., Rushlow, C., Doyle, H. and M. Levine, M. (1987). Characterization and localization of the *even-skipped* protein of *Drosophila*. *EMBO J.* **6**, 749-759.
- Fu, Y., Yan, W., Mohun, T. J. and Evans, S. M. (1998). Vertebrate *tinman* homologues *XNkx2-3* and *XNkx2-5* are required for heart formation in a functionally redundant manner. *Development* **125**, 4439-4449.
- Fujioka M., Jaynes, J. B. and Goto, T. (1995). Early *even-skipped* stripes act as morphogenetic gradients at the single cell level to establish *engrailed* expression. *Development* **121**, 4371-4382.
- Fujioka M., Miskiewicz, P., Raj, L., Gullede, A. A., Weir, M. and Goto, T. (1996). *Drosophila* Paired regulates late *even-skipped* expression through a composite binding site for the paired domain and the homeodomain. *Development* **122**, 2697-2707.
- Fujioka M., Emi-Sarker, Y., Yusibova, G. L., Goto, T. and Jaynes, J. B. (1999a). Analysis of an *evenskipped* rescue transgene reveals both composite and discrete neuronal and early blastoderm enhancers, and multi-stripe positioning by gap gene repressor gradients. *Development* in press.
- Fujioka M., Jaynes, J. B., Bejsovec, A. and Weir, M. (1999b). Production of transgenic *Drosophila*. In *Developmental Biology Protocols* (ed. R. Tuan and C. W. Wo). Totowa, New Jersey: The Humana Press, Inc. (in press).
- Gisselbrecht, S., Skeath, J., Doe, C. and Michelson, A. (1996). *heartless* encodes a fibroblast growth factor receptor (DFR1/DFGF-R2) involved in the directional migration of early mesodermal cells in the *Drosophila* embryo. *Genes Dev.* **10**, 3003-3017.
- Goto, T., MacDonald, P. and Maniatis, T. (1989). Early and late patterns of *even-skipped* expression are controlled by distinct regulatory elements that respond to different spatial cues. *Cell* **57**, 413-422.
- Greig, S. and Akam, M. (1993). Homeotic genes autonomously specify one aspect of pattern in the *Drosophila* mesoderm. *Nature* **362**, 630-635.
- Grow, M. W. and Krieg, P. A. (1998). *tinman* function is essential for vertebrate heart development: elimination of cardiac differentiation by dominant inhibitory mutants of the *tinman*-related genes *XNkx2-3* and *XNkx2-5*. *Dev. Biol.* **204**, 187-196.
- Guo, M., Jan, L. Y. and Jan, Y. N. (1996). Control of daughter cell fates during asymmetric cell division: interaction of Numb and Notch. *Neuron* **17**, 27-41.
- Harding, K., Hoey, T., Warrior, R. and Levine, M. (1989). Auto-regulatory

- and gap response elements of the *even-skipped* promoter of *Drosophila*. *EMBO J.* **8**, 1205-1212.
- Harvey, R. P.** (1996). NK-2 homeobox genes and Heart development. *Dev. Biol.* **178**, 203-216.
- Jagla, K., Frasnch, M., Jagla, T., Dretzen, G., Bellard, F. and Bellard, M.** (1997). *ladybird*, a new component of the cardiogenic pathway in *Drosophila* required for diversification of heart precursors. *Development* **124**, 3471-3479
- Kosman, D., Yp, Y. T., Levine, M. and Arora, K.** (1991). Establishment of the mesoderm-neuroectoderm boundary in the *Drosophila* embryo. *Science* **254**, 118-122.
- Lai, Z., Fortini, M. E. and Rubin, G. M.** (1991). The embryonic expression patterns of *zfh-1* and *zfh-2*, two *Drosophila* genes encoding novel zinc-finger homeodomain proteins. *Mech. Dev.* **34**, 123-134.
- Lai, Z., Rushton, E., Bate, M. and Rubin, G. M.** (1993). Loss of function of the *Drosophila zfh-1* gene results in abnormal development of mesodermally derived tissues. *Proc. Natl. Acad. Sci. USA* **90**, 4122-4126.
- Lilly, B., Zhao, B., Ranganayakulu, G., Patterson, B. M., Schulz, R. A. and Olson E. N.** (1995). Requirement of MADS domain transcription factor *D-MEF2* for muscle formation in *Drosophila*. *Science* **267**, 688-693.
- Leptin, M.** (1991). *twist* and *snail* as positive and negative regulators during *Drosophila* mesoderm development. *Genes Dev.* **5**, 1568-1576.
- Lyons, I., Parsons, L. M., Hartley, L., Li, R., Andrew, J. E., Robb, L. and Harvey, R. P.** (1995). Myogenic and morphogenetic defects in the heart tubes of murine embryos lacking the homeobox gene *Nkx2-5*. *Genes Dev.* **9**, 1654-1666.
- Mayer, U. and Nüsslein-Volhard, C.** (1988). A group of genes required for pattern formation in the ventral ectoderm of the *Drosophila* embryo. *Genes Dev.* **2**, 1496-1511.
- Moore, L. A., Broihier, H. T., Van Doren, M., Lunsford, L. B. and Lehmann, R.** (1998). Identification of genes controlling germ cell migration and embryonic gonad formation in *Drosophila*. *Development* **125**, 667-678.
- Mullen J. R. and DiNardo, S.** (1995). Establishing parasegments in *Drosophila* embryos: roles of the *odd-skipped* and *naked* genes. *Dev. Biol.* **169**, 295-308.
- Nüsslein-Volhard, C., Wieschaus, E. and Kluding, H.** (1984). Mutations affecting the pattern of the larval cuticle in *Drosophila melanogaster*. I. Zygotic loci on the second chromosome. *Roux' Arch. Dev. Biol.* **193**, 267-282.
- Olson, E. N. and Srivastava, D.** (1996). Molecular pathways controlling heart development. *Science* **272**, 671-676.
- Park, M., Lewis, C., Turbay, D., Chung, A., Chen, J.-N., Evans, S., Breitbart, R. E., Fishman, M., Izumo, S. and Bodmer, R.** (1998a). Differential rescue of visceral and cardiac defects in *Drosophila* by vertebrate *tinman*-related genes. *Proc. Natl. Acad. Sci. USA* **95**, 9366-9371.
- Park, M., Yaich, L. E. and Bodmer, R.** (1998b). Mesodermal cell fate decisions in *Drosophila* are under the control of the lineage genes *numb*, *Notch*, and *sanpodo*. *Mech. Dev.* **75**, 117-126.
- Ranganayakulu, G., Schulz, R. A. and Olson, E. N.** (1996). *wingless* signaling induces *nautilus* expression in the ventral mesoderm of the *Drosophila* embryo. *Dev. Biol.* **25**, 143-148.
- Ranganayakulu G., Elliott, D. A. Harvey, R. P. and Olson, E. N.** (1998). Divergent roles for NK-2 class homeobox genes in cardiogenesis in flies and mice. *Development* **125**, 3037-48.
- Rhyu, M. S., Jan, L. Y. and Jan, Y. N.** (1994). Asymmetric distribution of Numb protein during division of the sensory organ precursor cell confers distinct fates to daughter cells. *Cell* **76**, 477-491.
- Riechmann, V., Irion, U., Willson, R., Grosskortenhau, R. and Leptin, M.** (1997). Control of cell fates and segmentation in the *Drosophila* mesoderm. *Development* **124**, 2915-2922.
- Rizki, T. M.** (1987). The circulatory system and associated cells and tissues. In *The Genetics and Biology of Drosophila*, (ed. M. Ashburner and T. R. F. Wright), pp. 397-452. New York: Academic Press.
- Ruiz Gomez, M., Romani, S., Hartmann, C., Jäckle, H. and Bate, M.** (1997). Specific muscle identities are regulated by *Krüppel* during *Drosophila* embryogenesis. *Development* **124**, 3407-3414.
- Ruiz Gomez, M. and Bate, M.** (1997). Segregation of myogenic lineages in *Drosophila* requires *numb*. *Development* **124**, 4857-4866.
- Schultheiss, T. M., Burch, J. B. E. and Lassar, A. B.** (1997). A role for bone morphogenetic proteins in the induction of cardiac myogenesis. *Genes Dev.* **11**, 451-462.
- Shishido, E., Higashijima, S.-I., Emori, Y. and Saigo, K.** (1993). Two FGF-receptor homologs of *Drosophila*: One is expressed in mesodermal primordium in early embryos. *Development* **117**, 751-761.
- Shishido, E., Ono, N., Kojima, T. and Saigo, K.** (1997). Requirements of DFR1/Heartless, a mesoderm-specific *Drosophila* FGF-receptor, for the formation of heart, visceral and somatic muscles, and ensheathing of longitudinal axon tracts in the CNS. *Development* **124**, 2119-2128.
- Simpson, P.** (1983). Maternal-zygotic gene interactions involving the dorsal-ventral axis in *Drosophila* embryos. *Genetics* **105**, 615-632.
- Skeath, J. and Doe, C. Q.** (1998). Sanpodo and Notch act in opposition to Numb to distinguish sibling neuron fates in the *Drosophila* CNS. *Development* **125**, 1857-1865.
- Spana, E. P. and Doe, C. Q.** (1996). Numb antagonizes Notch signaling to specify sibling neuron cell fates. *Neuron* **17**, 21-26.
- Spradling, A.** (1986). P-element mediated transformation. In *Drosophila: a Practical Approach* (ed. D. B. Roberts), pp. 175-197. Oxford, Washington DC: IRL Press.
- Staebling-Hampton, K., Hoffmann, F. M., Baylies M. K., Rushton, E. and Bate M.** (1994). *dpp* induces mesodermal gene expression in *Drosophila*. *Nature* **372**, 783-786.
- Su, M.-T., Golden, K. and Bodmer, R.** (1998). X-gal staining of *Drosophila* embryos compatible with antibody staining or in situ hybridization. *Biotechniques* **24**, 918-920, 922.
- Takagi, T., Moribe, H., Kondoh, H. and Higashi, Y.** (1998). *-EF1*, a zinc finger and homeodomain transcription factor, is required for skeleton patterning in multiple lineages. *Development* **125**, 21-31.
- Tanaka M., Chen, Z., Bartunkova, S., Yamasaki, N. and Izumo, S.** (1999). The cardiac homeobox gene *Csx/Nkx2. 5* lies genetically upstream of multiple genes essential for heart development. *Development* **126**, 1269-1280.
- Thisse, B., Stoetzel, C., Gorositz-Thisse, C. and Perrin-Schmitt, F.** (1988). Sequence of the *twist* gene and nuclear localization of its protein in endomesodermal cells of early *Drosophila* embryos. *EMBO J.* **7**, 2175-2183.
- Uemura, T., Shepherd, S. Ackerman, L. Jan, L. Y. and Jan, Y. N.** (1989). *numb*, a gene required in determination of cell fate during sensory organ formation in *Drosophila* embryos. *Cell* **58**, 349-360.
- Wu, X., Golden, K. and Bodmer, R.** (1995). Heart development in *Drosophila* requires the segment polarity gene *wingless*. *Dev. Biol.* **169**, 619-628.
- Yaich, L. E., Ooj, J., Park, M., Landry, C., Bodmer, R. and Margolis, B.** (1998). Functional analysis of the Numb phosphotyrosine-binding domain using site-directed mutagenesis. *J. Biol. Chem.* **273**, 10381-10388.
- Yarnitzky, T. and Volk, T.** (1995). Laminin is required for heart, somatic muscles, and gut development in the *Drosophila* embryo. *Dev. Biol.* **169**, 609-618.
